# Supplementary material
Source: MDPI journal article supplement (https://www.mdpi.com/2072-4292/6/3/2343)

*Supplementary Information*

**Agricultural Monitoring in Northeastern Ontario, Canada,  
Using Multi-Temporal Polarimetric RADARSAT-2 Data.  
*Remote Sensing*, 2014, 6, 2343–2371**

**Jeffrey W. Cable <sup>1</sup>, John M. Kovacs <sup>1,\*</sup>, Xianfeng Jiao <sup>1</sup> and Jiali Shang <sup>2</sup>**

<sup>1</sup> Department of Geography, Nipissing University, 100 College Drive, North Bay, ON P1B 8L7, Canada; E-Mails: j.w.cable@hotmail.com (J.W.C.); xianfeng.jiao@nrcan-rncan.gc.ca (X.J.)

<sup>2</sup> Science and Technology Branch, Agriculture and Agri-Food Canada, 960 Carling Ave, Ottawa, ON K1A 0C6, Canada; E-Mail: jiali.shang@agr.gc.ca

\* Author to whom correspondence should be addressed; E-Mail: johnmk@nipissingu.ca;  
Tel.: +1-705-474-3450 (ext. 4336); Fax: +1-705-474-1947.

*Received: 26 December 2013; in revised form: 21 February 2014 / Accepted: 3 March 2014 /*

*Published: 17 March 2014*

---

## Supplementary A—Backscatter Intensities of Each Incidence Angle and Polarization

**Figure A1.** HH (Top); HV (Middle); and VV (Bottom) backscatter intensities for barley (Left) and canola (Right).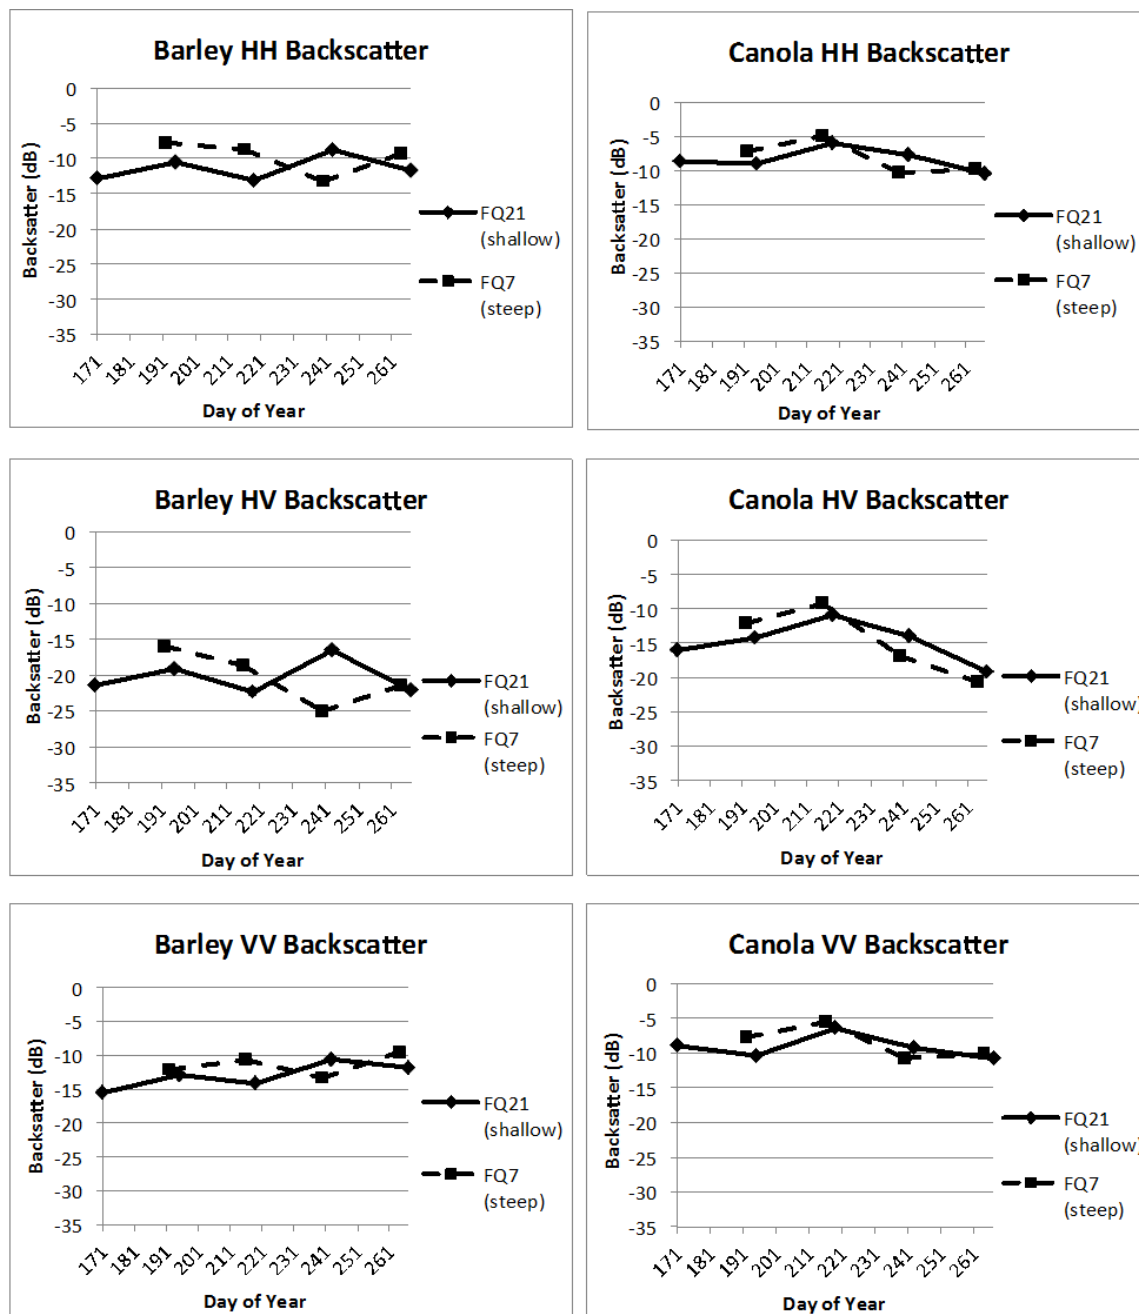

**Figure A2.** HH (Top); HV (Middle); and VV (Bottom) backscatter intensities for oat (Left) and soybean (Right).

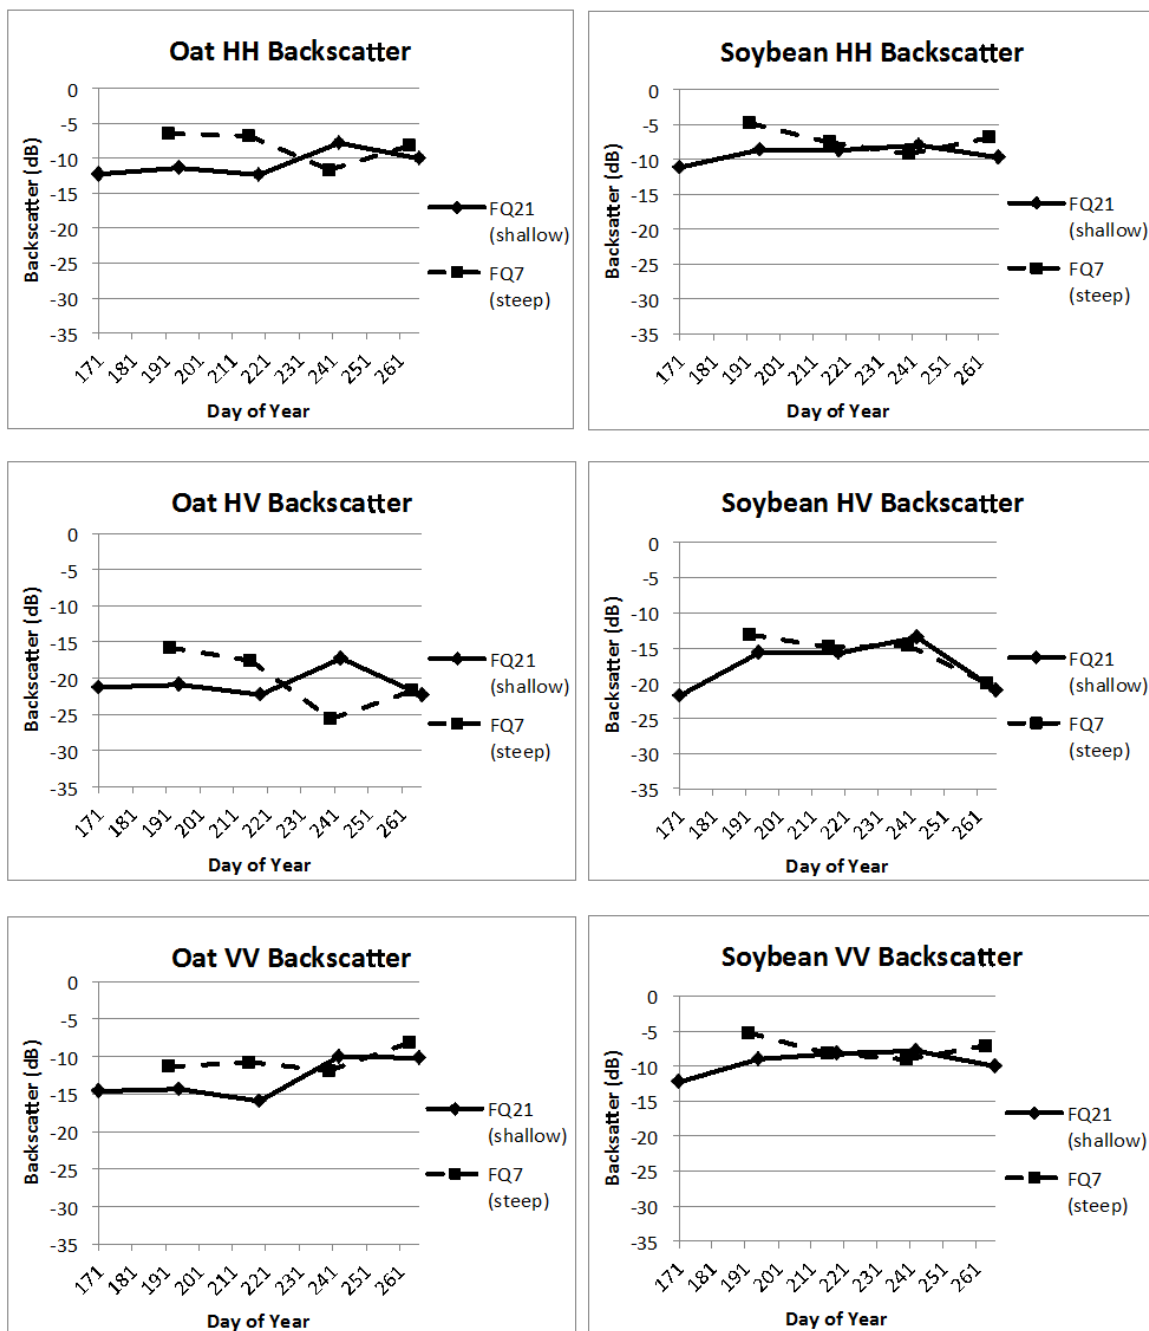

**Figure A3.** HH (Top); HV (Middle); and VV (Bottom) backscatter intensities for wheat.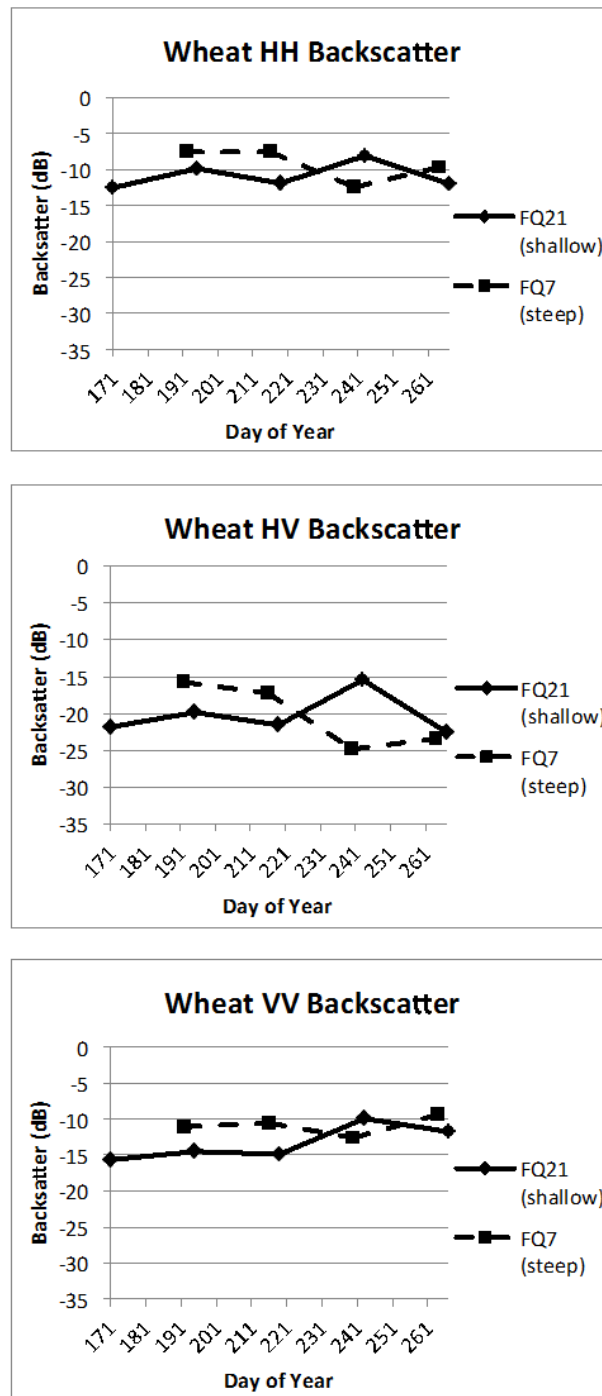

## Supplementary B—Polarization Response Plots

**Figure B1.** Barley co-polarization (**Top**) and cross-polarization (**Bottom**) signatures.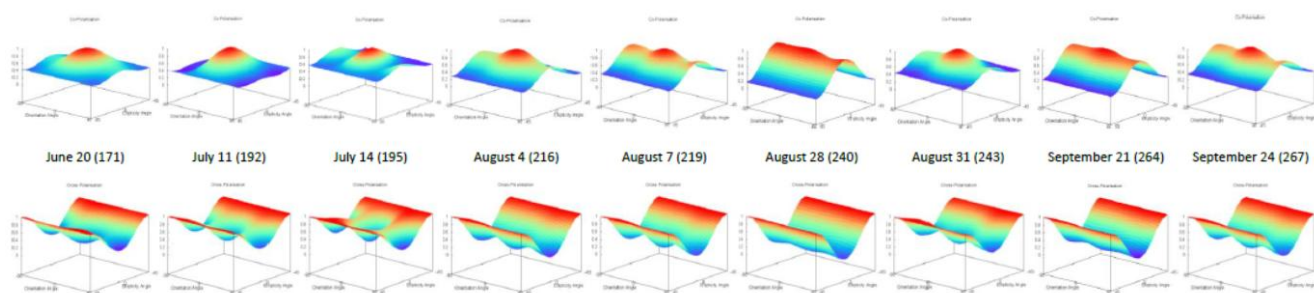**Figure B2.** Canola co-polarization (**Top**) and cross-polarization (**Bottom**) signatures.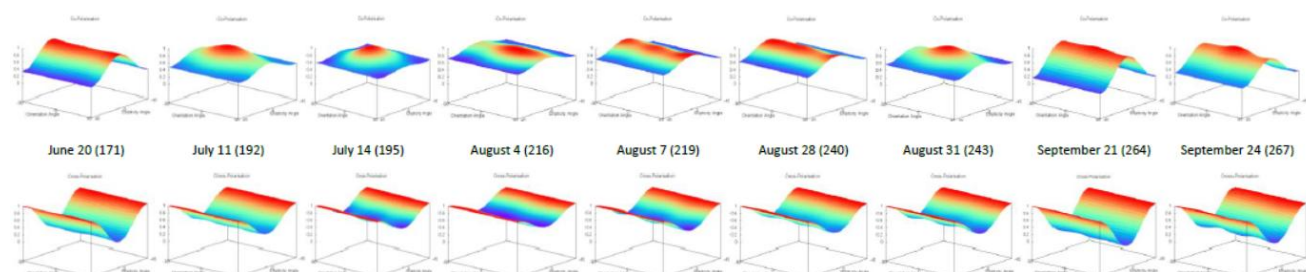**Figure B3.** Oat co-polarization (**Top**) and cross-polarization (**Bottom**) signatures.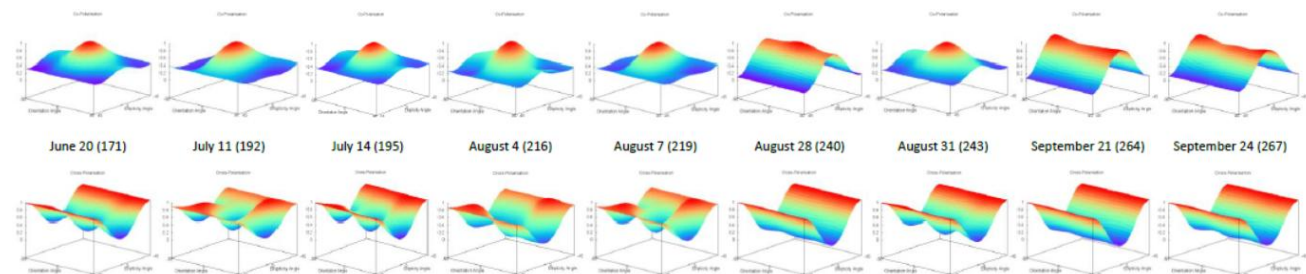**Figure B4.** Soybean co-polarization (**Top**) and cross-polarization (**Bottom**) signatures.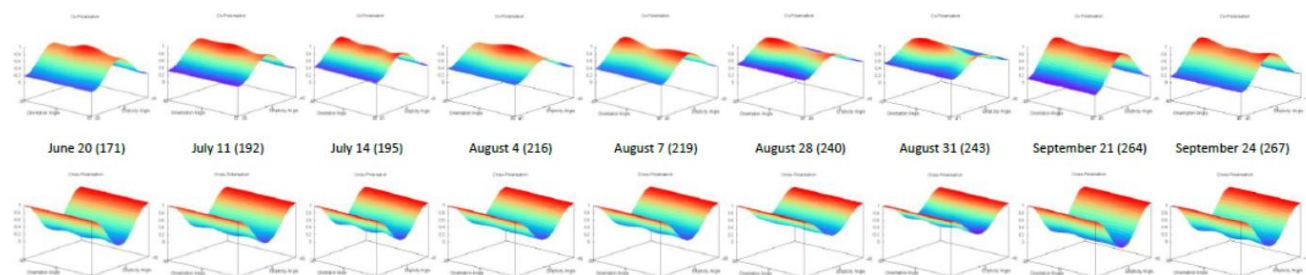

**Figure B5.** Wheat co-polarization (**Top**) and cross-polarization (**Bottom**) signatures.

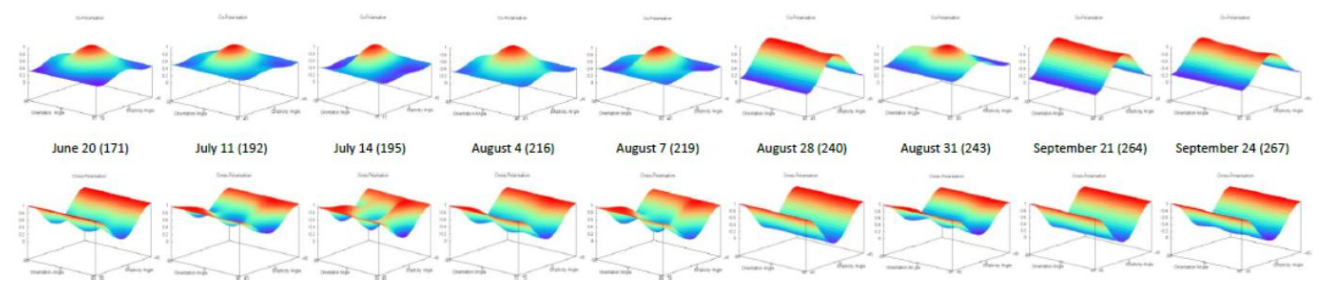

*Supplementary C—Cloude-Pottier H/ $\alpha$  Decomposition Plots*

**Figure C1.** Barley cloude-pottier decompositions for (a) 20 June; (b) 11 July; and (c) 14 July.

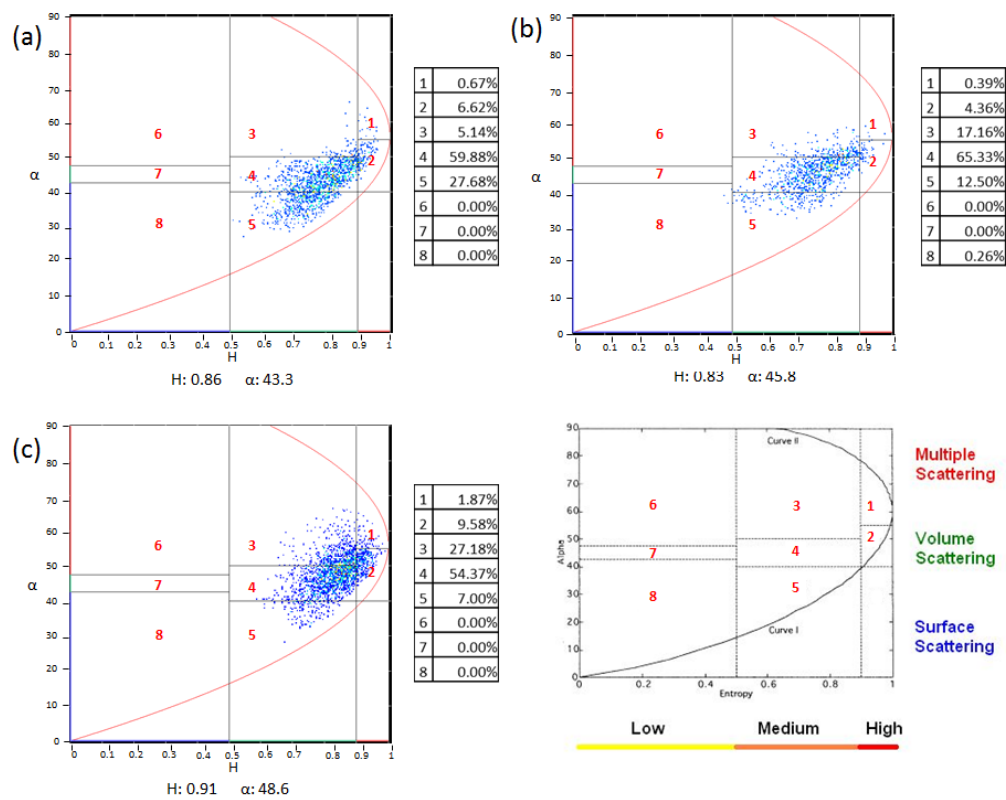

**Figure C2.** Barley cloude-pottier decompositions for (a) 4 August; (b) 7 August; and (c) 28 August.

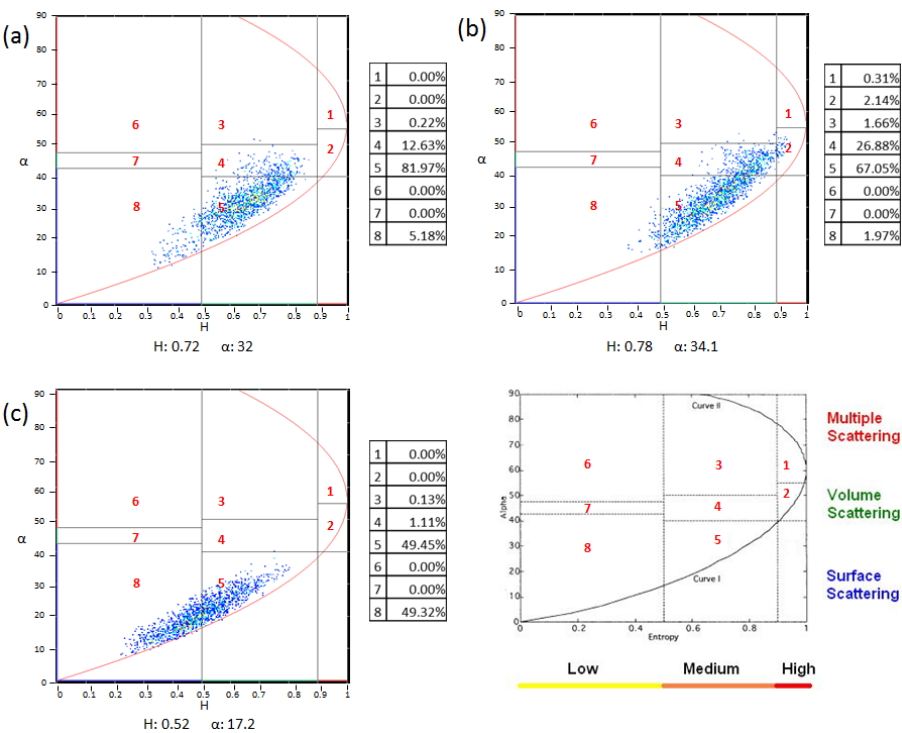

**Figure C3.** Barley cloude-pottier decompositions for (a) 31 August; (b) 21 September; and (c) 24 September.

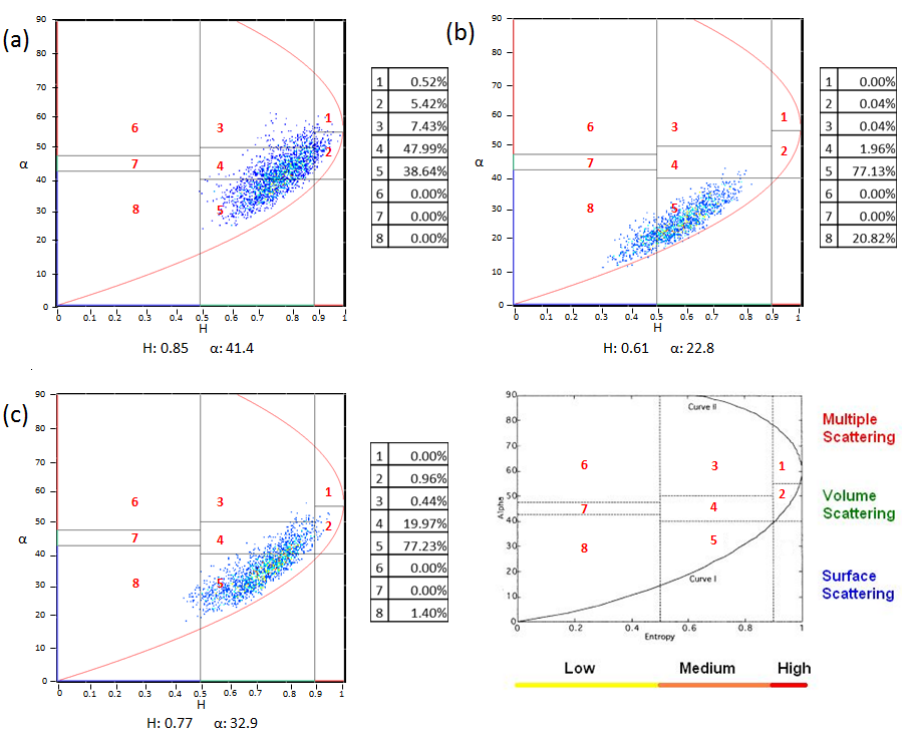

**Figure C4.** Canola cloude-pottier decompositions for (a) 20 June; (b) 11 July; and (c) 14 July.

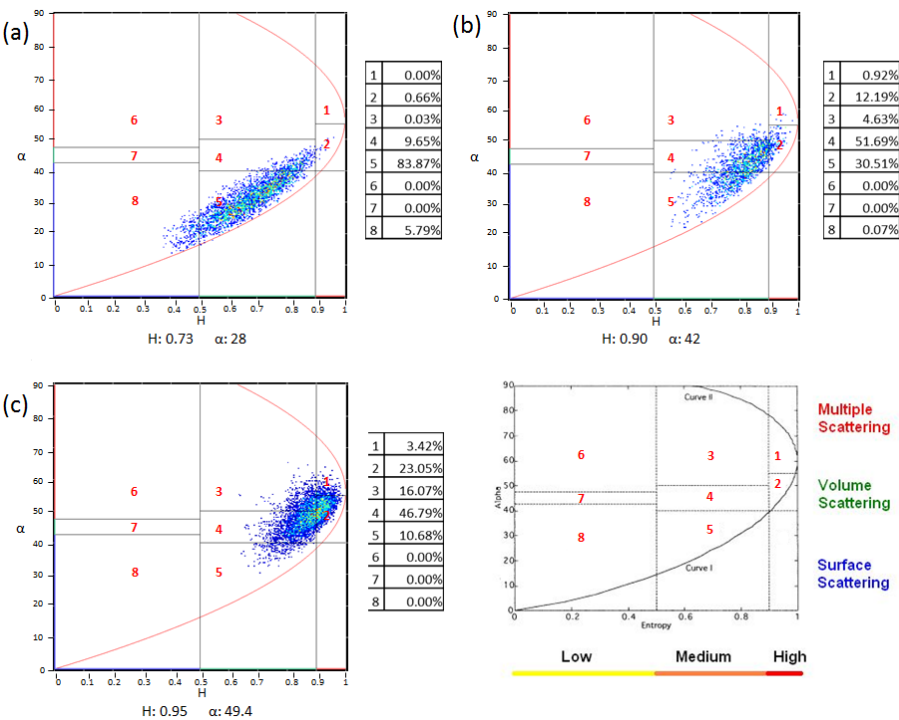

**Figure C5.** Canola cloude-pottier decompositions for (a) 4 August; (b) 7 August; and (c) 28 August.

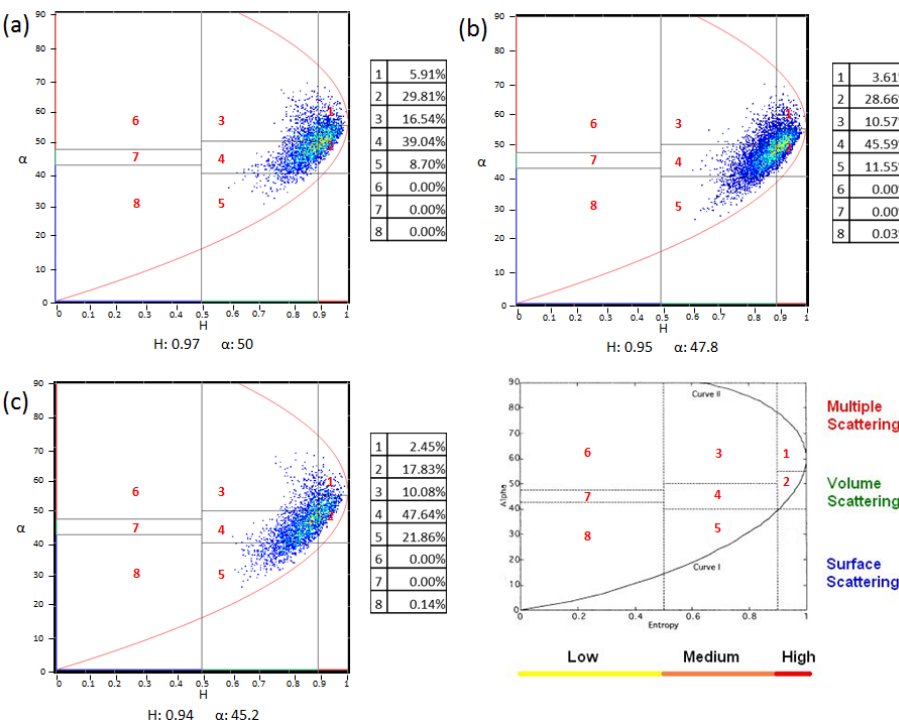

**Figure C6.** Canola cloud-e-pottier decompositions for (a) 31 August; (b) 21 September; and (c) 24 September.

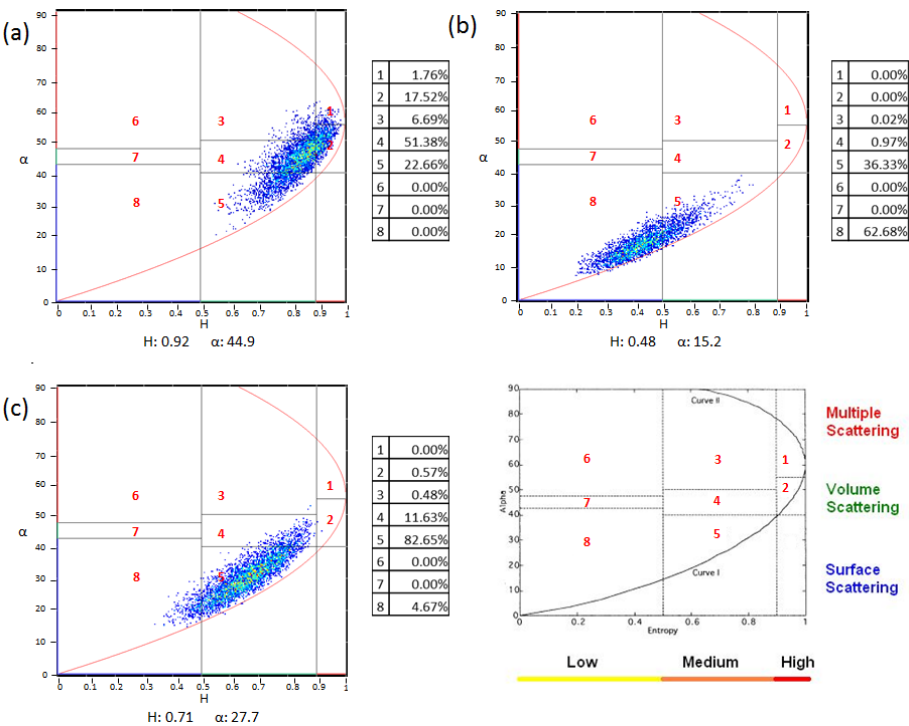

**Figure C7.** Oat cloud-e-pottier decompositions for (a) 20 June; (b) 11 July; and (c) 14 July.

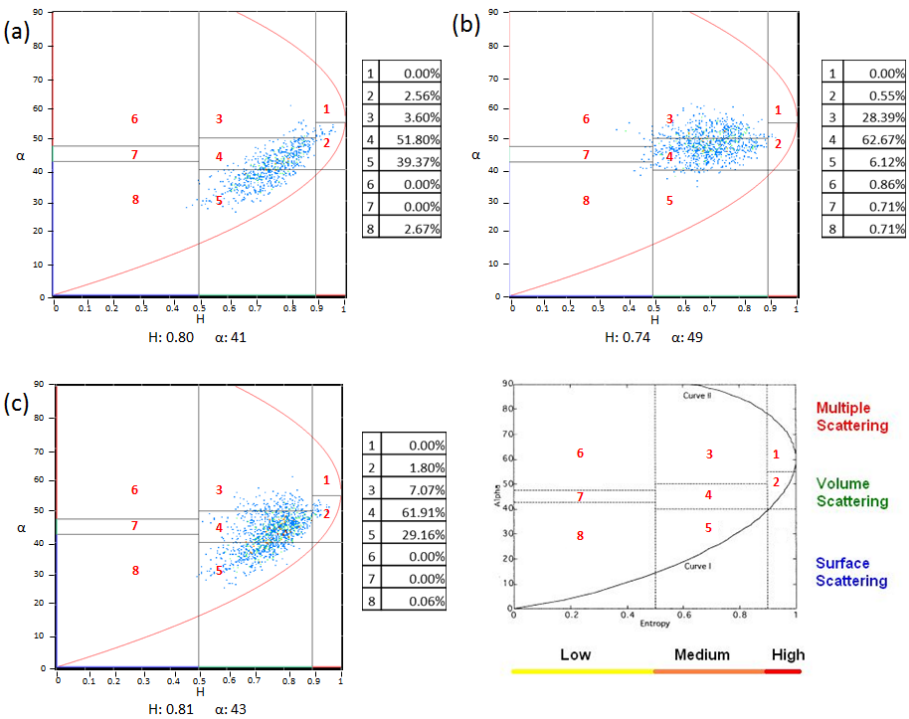

**Figure C8.** Oat cloud-pottier decompositions for (a) 4 August; (b) 7 August; and (c) 28 August.

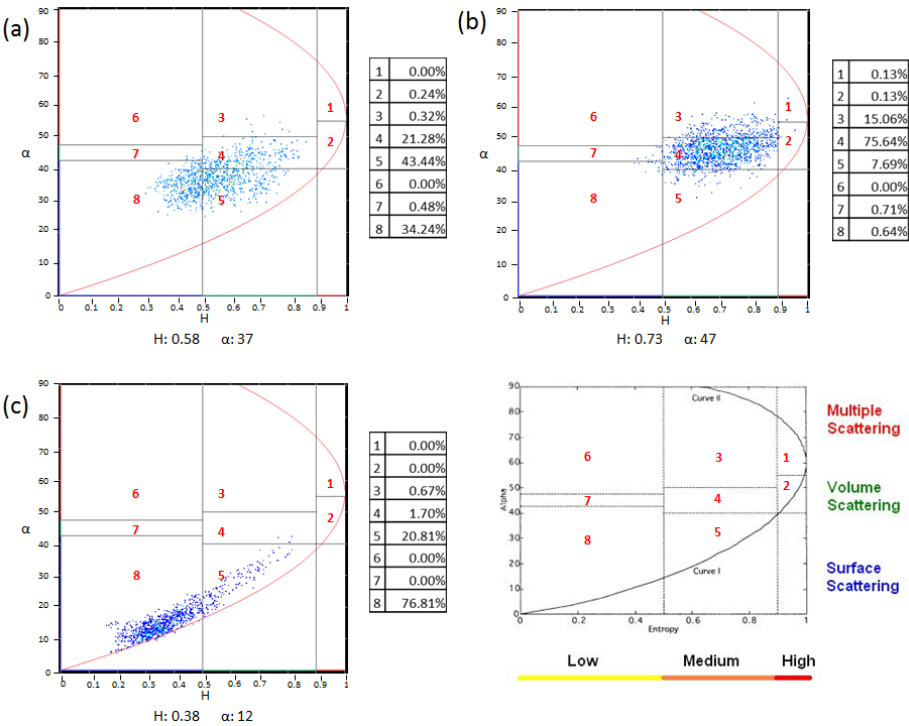

**Figure C9.** Oat cloud-pottier decompositions for (a) 31 August; (b) 21 September; and (c) 24 September.

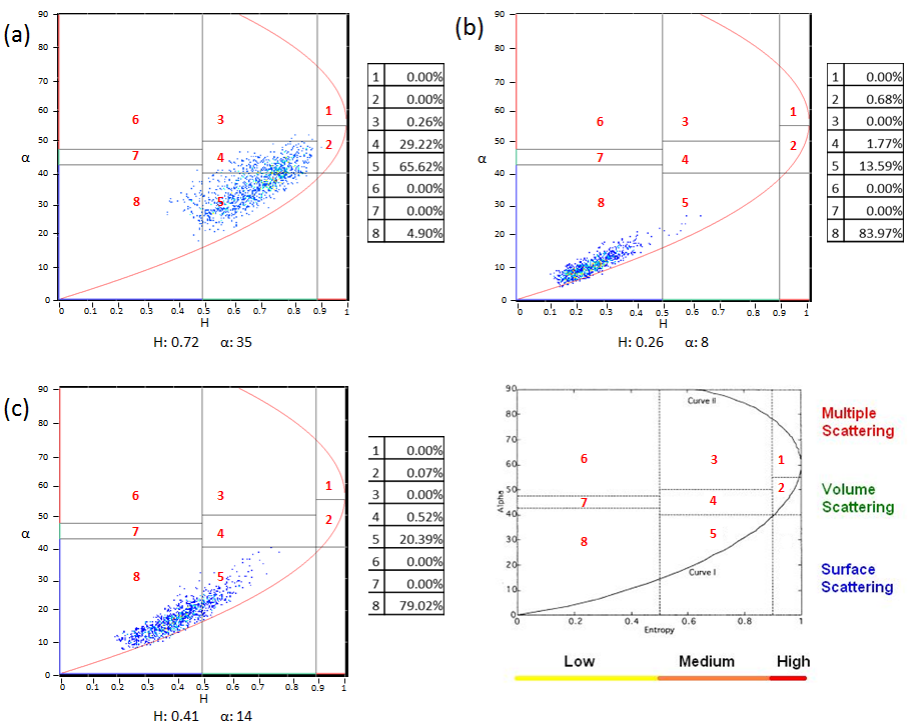

**Figure C10.** Soybean cloude-pottier decompositions for (a) 20 June; (b) 11 July; and (c) 14 July.

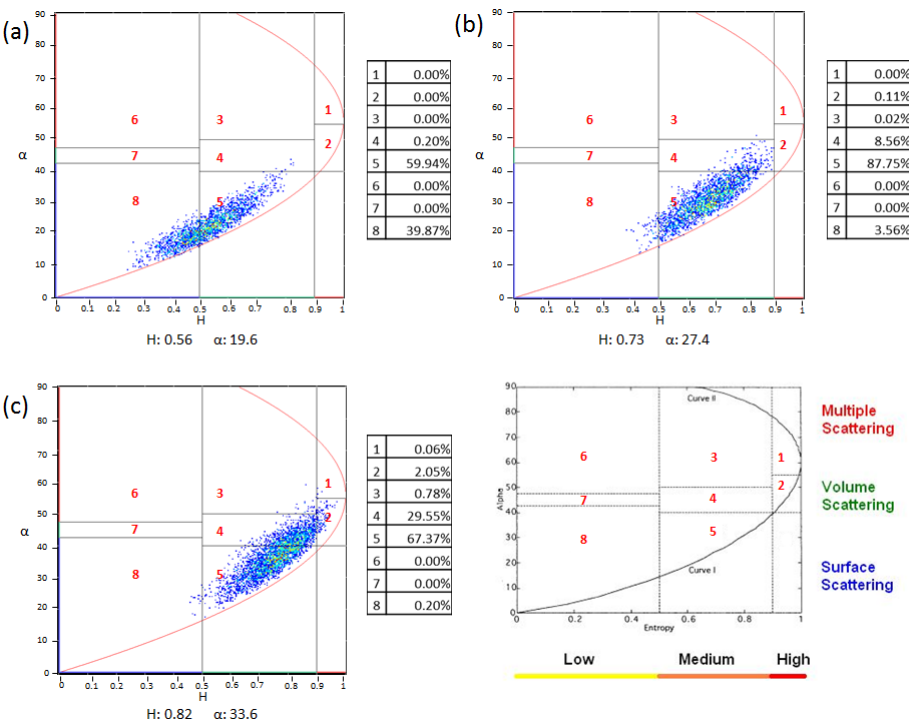

**Figure C11.** Soybean cloude-pottier decompositions for (a) 4 August; (b) 7 August; and (c) 28 August.

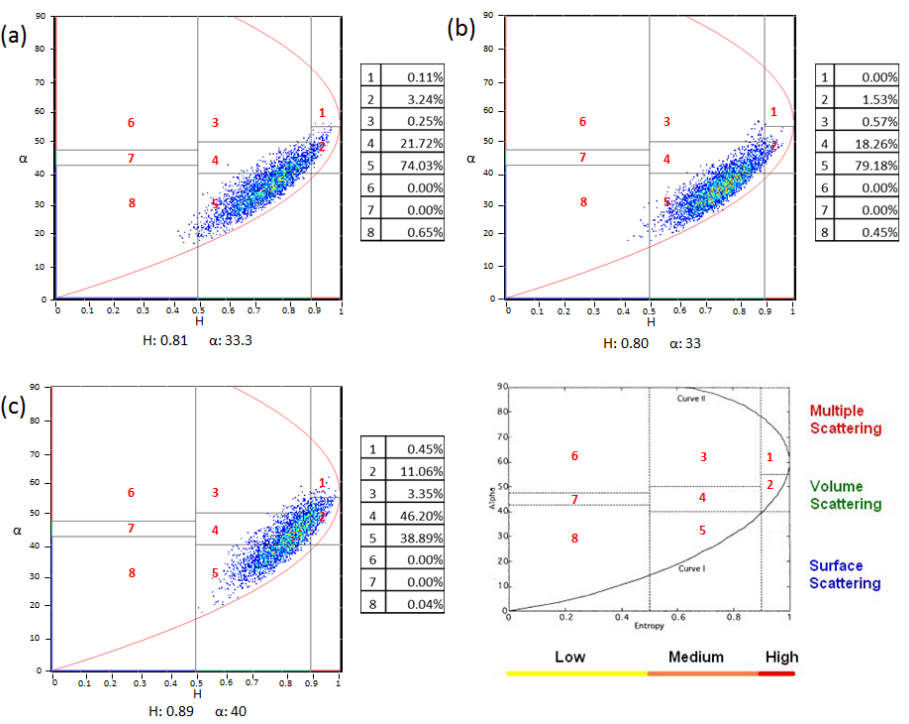

**Figure C12.** Soybean cloudé-pottier decompositions for (a) 31 August; (b) 21 September; and (c) 24 September.

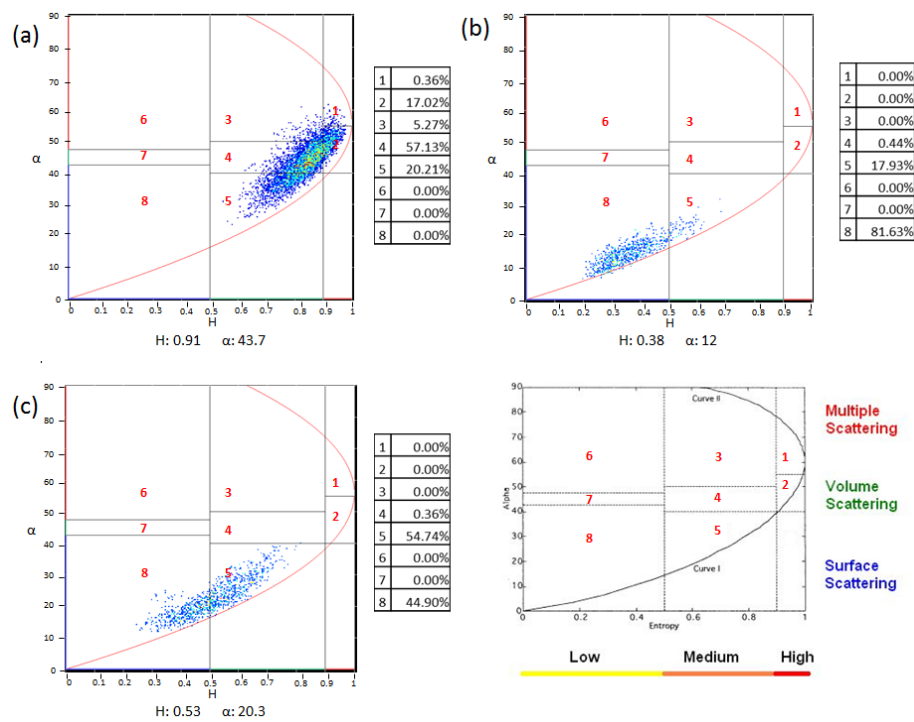

**Figure C13.** Wheat cloudé-pottier decompositions for (a) 20 June; (b) 11 July; and (c) 14 July.

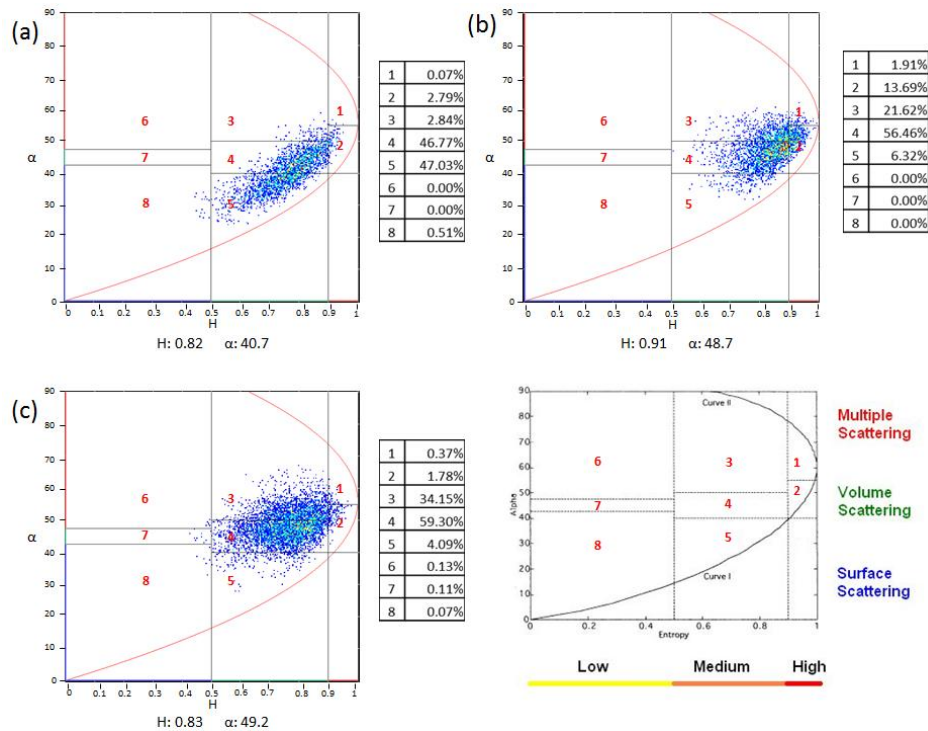

**Figure C14.** Wheat cloude-pottier decompositions for (a) 4 August; (b) 7 August; and (c) 28 August.

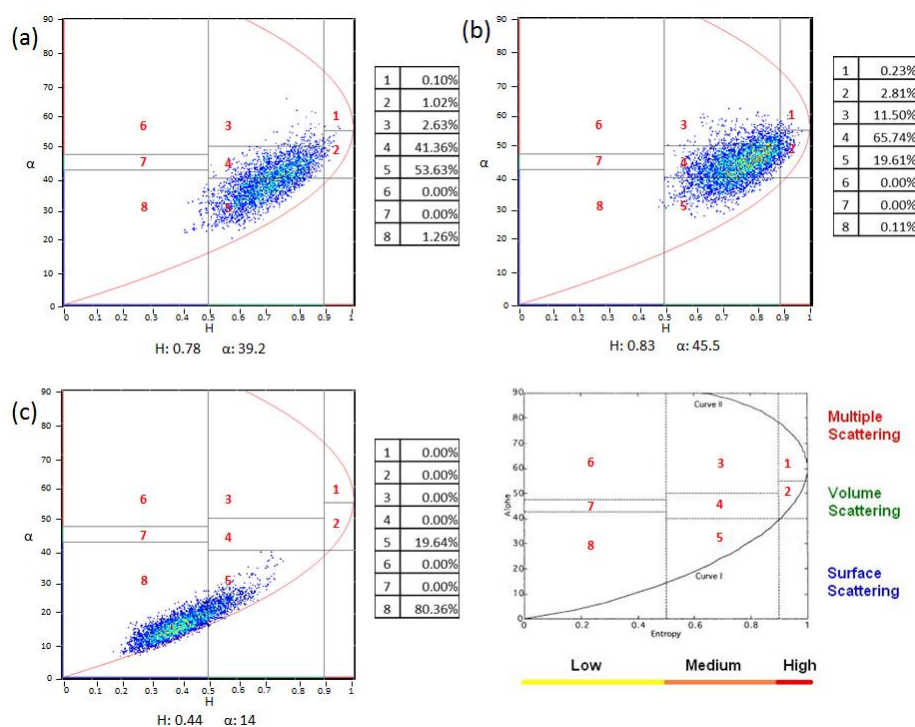

**Figure C15.** Wheat cloude-pottier decompositions for (a) 31 August; (b) 21 September; and (c) 24 September.

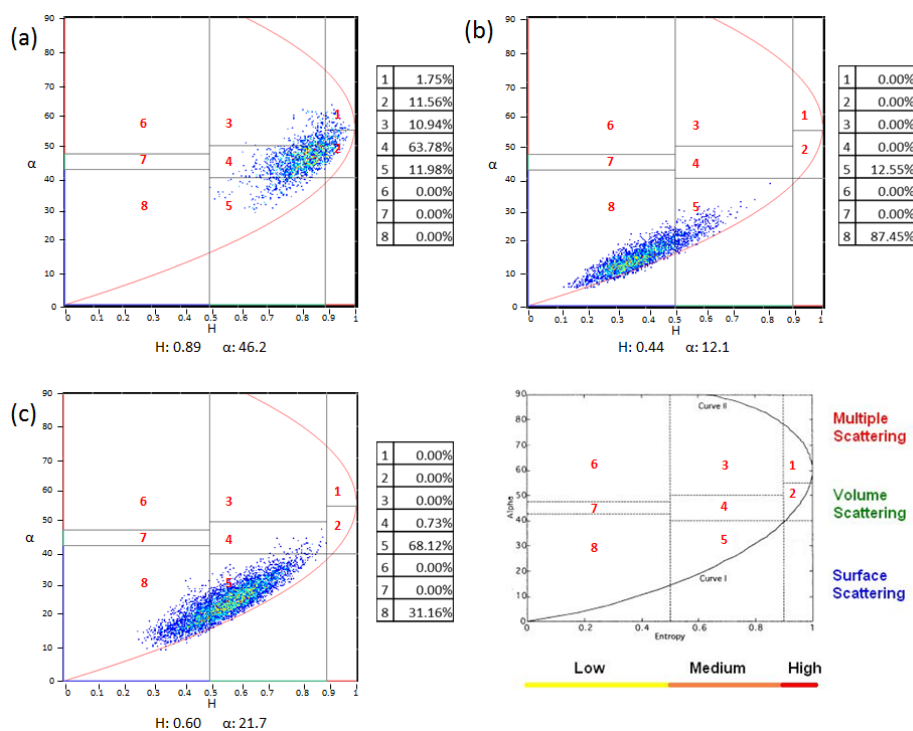

Supplement: s1 [file s1]
